# Supplementary material for: Transcriptome and metabolome profiling reveal the inhibitory effects of food preservatives on pathogenic fungi
Source: PeerJ journal article supplement (doi:10.7717/peerj.19737), 2025-07-23
Supplement: Figure_S1.pdf [file Figure_S1.pdf]

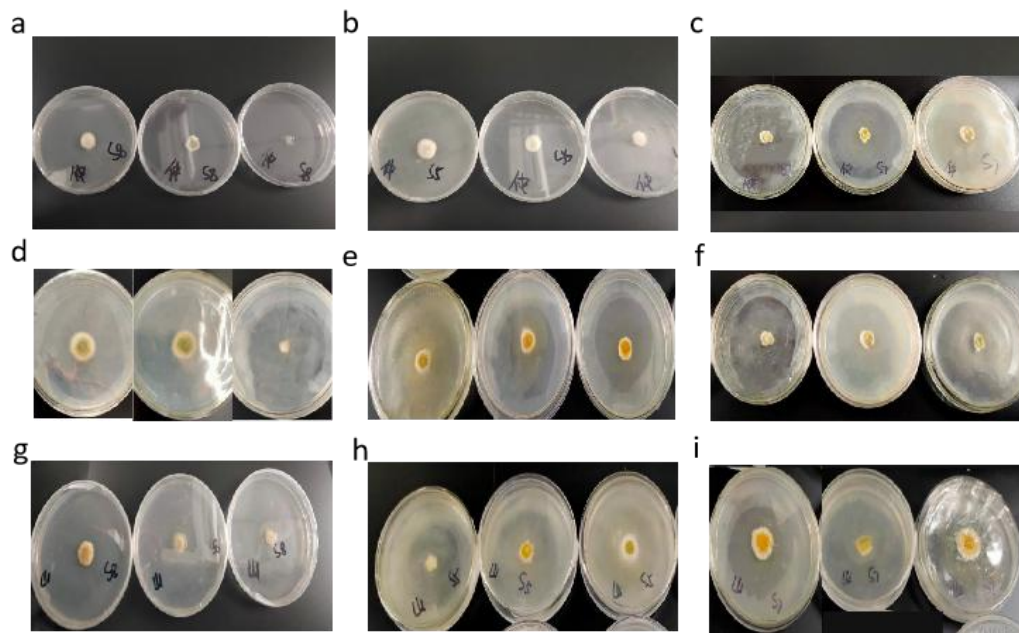

Figure S1. Growth inhibition of pathogenic bacteria by three preservation. (a) Growth inhibition of *Aspergillus flavus* by sec-butylamine; (b) Growth inhibition of *Alternaria alternata* by sec-butylamine; (c) Growth inhibition of *Talaromyces funiculosus* by sec-butylamine; (d) Growth inhibition of *Aspergillus flavus* by citric acid; (e) Growth inhibition of *Alternaria alternata* by citric acid; (f) Growth inhibition of *Talaromyces funiculosus* by citric acid; (g) Growth inhibition of *Aspergillus flavus* by potassium; (h) Growth inhibition of *Alternaria alternata* by potassium; (i) Growth inhibition of *Talaromyces funiculosus* by potassium sorbate.
