# Supplementary material for: Transcriptome and metabolome profiling reveal the inhibitory effects of food preservatives on pathogenic fungi
Source: PeerJ journal article supplement (doi:10.7717/peerj.19737), 2025-07-23
Supplement: Figure_S2.pdf [file Figure_S2.pdf]

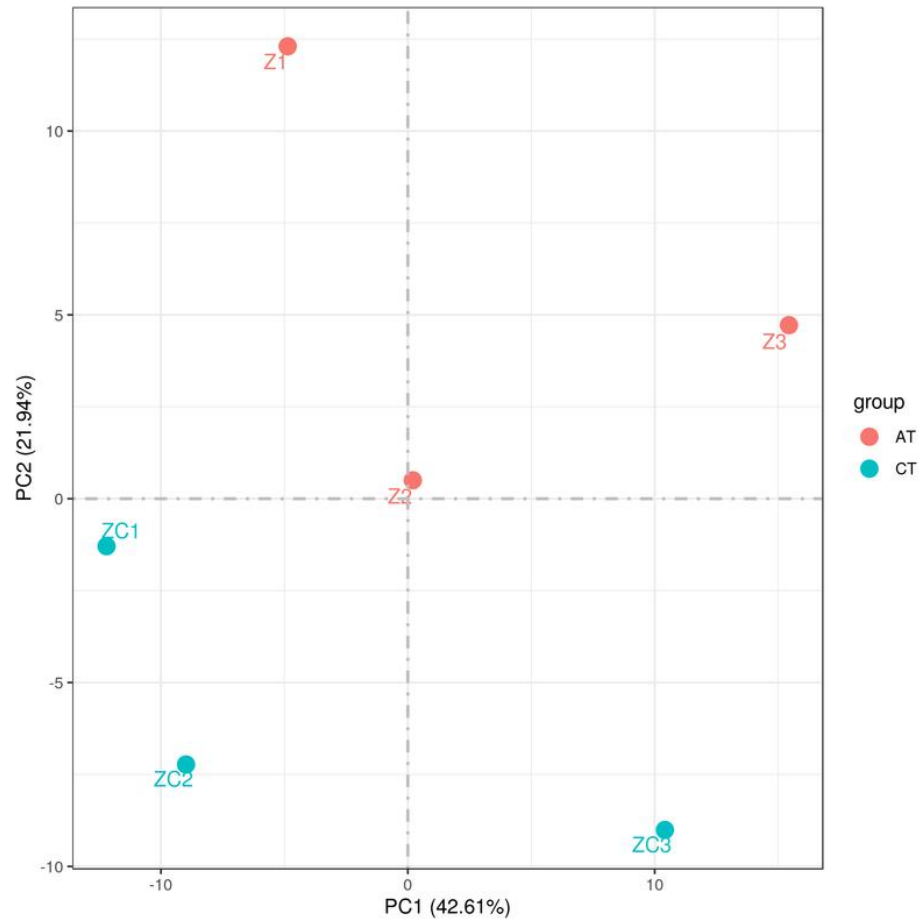

Figure S2. PCA analysis of *Aspergillus flavus* samples. Z1, Z2, and Z3 represented treatment samples, and ZC1, ZC2, and ZC3 represented control samples.
