# Supplementary material for: Transcriptome and metabolome profiling reveal the inhibitory effects of food preservatives on pathogenic fungi
Source: PeerJ journal article supplement (doi:10.7717/peerj.19737), 2025-07-23
Supplement: Figure_S4.pdf [file Figure_S4.pdf]

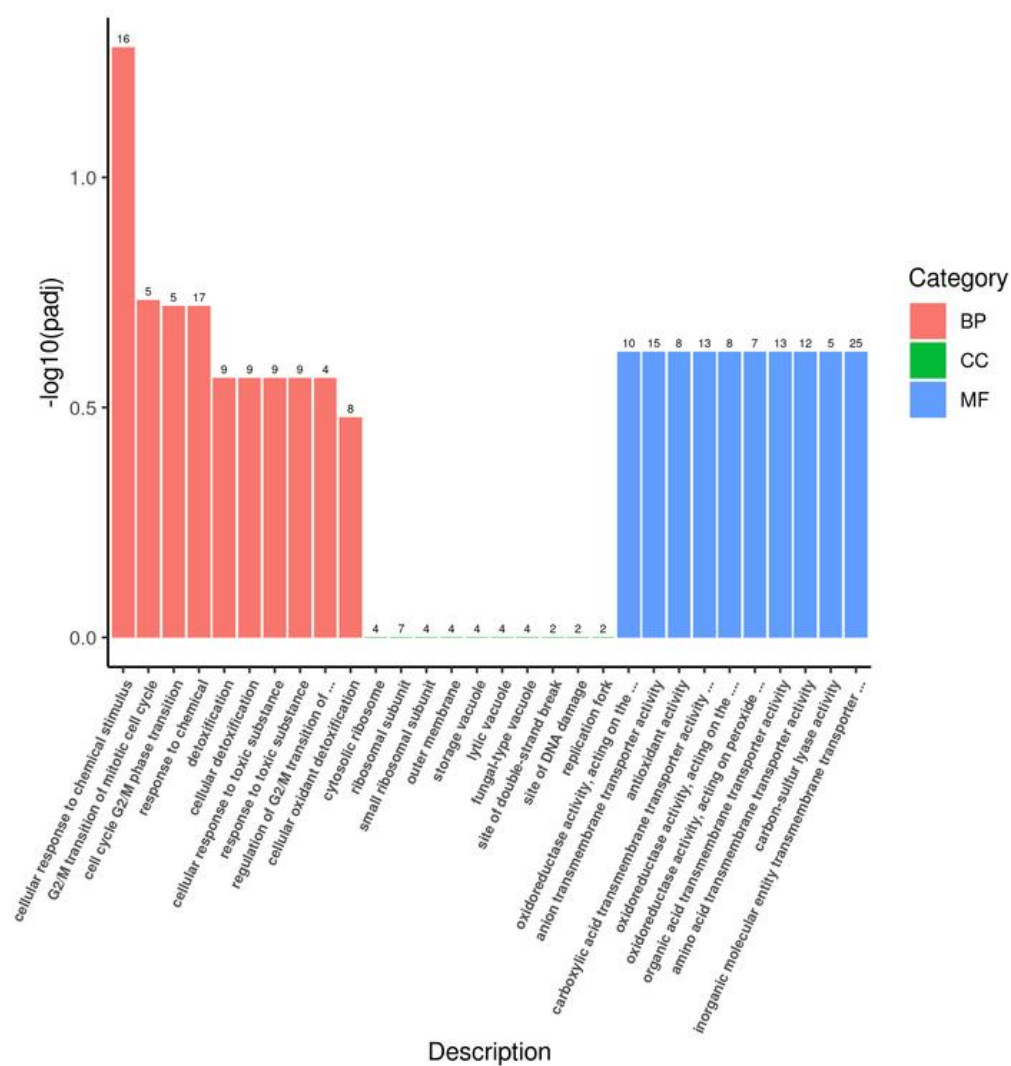

Figure S4. GO annotation classification of differentially expressed genes (DEGs).
