# Supplementary material for: Transcriptome and metabolome profiling reveal the inhibitory effects of food preservatives on pathogenic fungi
Source: PeerJ. 2025 Jul 23;13:e19737. doi: 10.7717/peerj.19737 (PMC12296564; doi:10.7717/peerj.19737)
Supplement: Supplemental Information 10 [file peerj-13-19737-s010.xlsx]

## Sheet: Sheet1
ID	Name	Other_name(Kegg_name)	Formula	Molecular Weight	RT [min]	m/z	Kegg_ID	KEGG_pathway	HMDB_ID	Lipidmaps_ID	SuperClass(HMDB)	Class(HMDB)	SubClass(HMDB)	CATEGORY(Lipidmaps)	MAIN_CLASS(Lipidmaps)	SUB_CLASS(Lipidmaps)	mzCloud_Results	mzVault_Results	MassList_Results	Class_I	Class_II	Class_III	Class_IV	FC	log2FC	Pvalue	ROC	VIP	Up.Down	neg_D_1	neg_D_2	neg_D_3	neg_D_4	neg_D_5	neg_D_6	neg_DC_1	neg_DC_2	neg_DC_3	neg_DC_4	neg_DC_5	neg_DC_6
Com_45_neg	MAM2201 N-pentanoic acid metabolite	--	C25 H23 N O3	385.173	6.774	384.166	--	--	--	--	--	--	--	--	--	--	Invalid mass	No results	No results	Organoheterocyclic compounds	Indoles and derivatives	Naphthoylindoles	Naphthoylindoles	3.3924	1.76231	7.21843e-05	1	1.94065	up	2.65789e+09	2.34466e+09	2.38817e+09	1.17259e+09	2.39993e+09	2.3717e+09	7.18579e+08	4.41778e+08	4.68705e+08	4.65326e+08	1.03184e+09	8.04596e+08
Com_3145_neg	Ip7G	--	C16 H23 N5 O5	365.172	5.336	364.164	--	--	--	--	--	--	--	--	--	--	No results	No results	Full match					2.84294	1.50739	9.0124e-05	1	1.94122	up	2.43736e+07	1.34189e+07	2.84812e+07	1.82782e+07	2.29821e+07	2.18929e+07	4.88666e+06	1.13746e+07	9.53891e+06	7.05274e+06	6.74491e+06	5.92785e+06
Com_9257_neg	Psilocybin	Psilocybin; Psilocybine	C12 H17 N2 O4 P	284.098	2.557	265.08	cpd:C07576	--	--	--	--	--	--	--	--	--	Invalid mass	No results	No results	Organoheterocyclic compounds	Indoles and derivatives	Tryptamines and derivatives	Tryptamines and derivatives	2.96234	1.56674	0.000309537	1	1.8782	up	7.8118e+06	6.19759e+06	4.4291e+06	5.97662e+06	9.39757e+06	4.73212e+06	1.62438e+06	1.58136e+06	1.83176e+06	1.38264e+06	2.63784e+06	3.95362e+06
Com_18422_neg	All-Trans-13,14-Dihydroretinol	all-trans-13,14-Dihydroretinol; 13,14-Dihydroretinol	C20 H32 O	288.245	9.014	287.238	cpd:C15492	--	HMDB0011618	LMPR01090047	Lipids and lipid-like molecules	Prenol lipids	Retinoids	Prenol Lipids [PR]	Isoprenoids [PR01]	Retinoids [PR0109]	No results	No results	Full match					0.307954	-1.69921	0.00077373	0.972222	1.83367	down	312468	479988	267850	384131	208380	359383	1.33353e+06	1.60867e+06	836496	1.3636e+06	456659	935124
Com_2892_neg	Phe-Pro	--	C14 H18 N2 O3	262.131	5.485	261.124	--	--	HMDB0011177	--	Organic acids and derivatives	Carboxylic acids and derivatives	Amino acids, peptides, and analogues	--	--	--	No results	No results	Full match	Organic acids and derivatives	Carboxylic acids and derivatives	Amino acids, peptides, and analogues	Dipeptides	2.05751	1.0409	0.000847117	1	1.8126	up	3.70056e+07	2.60739e+07	3.09916e+07	2.94542e+07	4.75645e+07	3.59932e+07	9.74029e+06	1.5335e+07	1.44951e+07	2.31093e+07	1.80589e+07	1.99088e+07
Com_6172_neg	1-Methylguanosine	--	C11 H15 N5 O5	297.107	4.81	296.1	--	--	HMDB0001563	--	Nucleosides, nucleotides, and analogues	Purine nucleosides	-	--	--	--	No results	No results	Full match	Nucleosides, nucleotides, and analogues	Purine nucleosides	Not available	Purine nucleosides	4.67448	2.2248	0.000859759	1	1.7939	up	1.30308e+07	4.17993e+06	9.38557e+06	4.19227e+06	1.0834e+07	1.26944e+07	1.12452e+06	2.52969e+06	671630	1.34258e+06	1.83197e+06	4.11951e+06
Com_2136_neg	gamma-Glutamylcysteine	gamma-L-Glutamyl-L-cysteine; L-gamma-Glutamylcysteine; 5-L-Glutamyl-L-cysteine; gamma-Glutamylcysteine	C8 H14 N2 O5 S	250.062	1.523	249.055	cpd:C00669	map00480 Glutathione metabolism;map01100 Metabolic pathways	HMDB0001049	--	Organic acids and derivatives	Carboxylic acids and derivatives	Amino acids, peptides, and analogues	--	--	--	No results	No results	Full match	Organic acids and derivatives	Carboxylic acids and derivatives	Amino acids, peptides, and analogues	N-acyl-alpha amino acids	2.01491	1.01071	0.000928651	0.972222	1.79804	up	6.03553e+07	3.5701e+07	3.82868e+07	2.56215e+07	4.35084e+07	3.53567e+07	1.5242e+07	1.81345e+07	1.74174e+07	1.84207e+07	2.84605e+07	2.08561e+07
Com_1661_neg	DL-β-Leucine	--	C6 H13 N O2	131.094	4.157	130.086	--	--	--	--	--	--	--	--	--	--	Invalid mass	No results	No results	Organic acids and derivatives	Carboxylic acids and derivatives	Amino acids, peptides, and analogues	Beta amino acids and derivatives	1.79161	0.841255	0.00103693	1	1.77167	up	5.43757e+07	3.65634e+07	6.26899e+07	3.6085e+07	5.11997e+07	5.22641e+07	2.07656e+07	2.56371e+07	2.1096e+07	3.54592e+07	3.02491e+07	3.04325e+07
Com_4703_neg	N3-(4-chlorophenyl)-4-(trifluoromethyl)nicotinamide	--	C13 H8 Cl F3 N2 O	300.027	7.88	299.019	--	--	--	--	--	--	--	--	--	--	Full match	No results	No results					0.194687	-2.36077	0.00108355	1	1.841	down	2.85091e+06	3.22744e+06	1.60238e+06	1.56622e+06	2.02826e+06	1.57801e+06	1.37675e+07	1.41283e+07	1.28148e+07	1.68732e+07	4.7579e+06	3.67835e+06
Com_7931_neg	2-Hydroxymyristic acid	--	C14 H28 O3	244.203	7.15	243.196	--	--	HMDB0002261	LMFA01050484	Lipids and lipid-like molecules	Fatty Acyls	Fatty acids and conjugates	Fatty Acyls [FA]	Fatty Acids and Conjugates [FA01]	Hydroxy fatty acids [FA0105]	Full match	No results	No results	Lipids and lipid-like molecules	Fatty Acyls	Fatty acids and conjugates	Long-chain fatty acids	1.6495	0.722025	0.00111375	0.972222	1.77793	up	9.43022e+06	8.54692e+06	7.75893e+06	7.23127e+06	9.92815e+06	5.7104e+06	5.39837e+06	4.45766e+06	4.91658e+06	5.94123e+06	3.58508e+06	5.1682e+06
Com_5465_neg	2'-Deoxyinosine	--	C10 H12 N4 O4	252.086	4.174	251.078	--	--	HMDB0000071	--	Nucleosides, nucleotides, and analogues	Purine nucleosides	Purine 2'-deoxyribonucleosides	--	--	--	Full match	Full match	Full match	Nucleosides, nucleotides, and analogues	Purine nucleosides	Purine 2'-deoxyribonucleosides	Purine 2'-deoxyribonucleosides	6.25107	2.6441	0.00130602	0.972222	1.76236	up	1.75139e+07	7.15771e+06	1.06547e+07	2.87354e+06	1.84166e+07	4.3371e+06	1.26567e+06	1.01109e+06	543423	1.32964e+06	1.83065e+06	3.77043e+06
Com_10496_neg	Homogentisic acid	Homogentisate; Homogentisic acid; 2,5-Dihydroxyphenylacetic acid; 2,5-Dihydroxyphenylacetate	C8 H8 O4	168.041	4.859	167.034	cpd:C00544	map00130 Ubiquinone and other terpenoid-quinone biosynthesis;map00350 Tyrosine metabolism;map01100 Metabolic pathways	HMDB0000130	--	Benzenoids	Benzene and substituted derivatives	Phenylacetic acids	--	--	--	Invalid mass	Invalid mass	No results	Benzenoids	Benzene and substituted derivatives	Phenylacetic acids	2(hydroxyphenyl)acetic acids	2.22926	1.15656	0.00133584	0.944444	1.79069	up	2.84392e+06	2.98761e+06	4.02278e+06	4.29349e+06	3.84551e+06	5.44172e+06	1.65254e+06	1.26341e+06	1.55855e+06	1.33591e+06	1.30891e+06	3.39315e+06
Com_17698_neg	Lysopa 16:0	--	C19 H39 O7 P	410.243	10.153	409.235	--	--	--	--	--	--	--	--	--	--	No results	No results	Full match	Lipids and lipid-like molecules	Glycerophospholipids	Glycerophosphates	1-acylglycerol-3-phosphates	0.120224	-3.0562	0.00140886	1	1.83965	down	85981.9	121232	62080.7	201063	118744	86182.6	677884	352579	903250	930878	2.52078e+06	231509
Com_1611_neg	5-Aminovaleric acid	5-Aminopentanoate; 5-Aminopentanoic acid; 5-Aminovaleric acid	C5 H11 N O2	117.078	3.346	116.071	cpd:C00431	map00310 Lysine degradation;map00330 Arginine and proline metabolism	HMDB0003355	--	Organic acids and derivatives	Carboxylic acids and derivatives	Amino acids, peptides, and analogues	--	--	--	Invalid mass	No results	No results	Organic acids and derivatives	Carboxylic acids and derivatives	Amino acids, peptides, and analogues	Delta amino acids and derivatives	2.40535	1.26625	0.00143124	1	1.80486	up	6.25155e+07	3.82301e+07	6.43536e+07	4.03808e+07	5.55816e+07	5.00157e+07	9.45561e+06	1.89401e+07	2.20945e+07	2.85565e+07	2.85175e+07	2.1763e+07
Com_10654_neg	LPA 17:0	--	C20 H41 O7 P	424.259	10.43	423.251	--	--	--	LMGP10050036	--	--	--	Glycerophospholipids [GP]	Glycerophosphates [GP10]	Monoacylglycerophosphates [GP1005]	No results	Full match	No results	Lipids and lipid-like molecules	Glycerophospholipids	Glycerophosphates	1,2-diacylglycerol-3-phosphates	0.207777	-2.26689	0.00143833	1	1.76191	down	393181	1.0765e+06	290273	1.02563e+06	553796	366672	1.65743e+06	1.4016e+06	3.20466e+06	2.56271e+06	7.49912e+06	1.5111e+06
Com_457_neg	N-Acetyl-1-aspartylglutamic acid	--	C11 H16 N2 O8	304.09	2.676	303.083	--	--	HMDB0255414	--	Organic acids and derivatives	Carboxylic acids and derivatives	Amino acids, peptides, and analogues	--	--	--	Full match	No results	Full match	Organic acids and derivatives	Carboxylic acids and derivatives	Amino acids, peptides, and analogues	Dipeptides	3.03107	1.59983	0.00182654	0.944444	1.73574	up	3.04974e+08	1.67955e+08	2.65672e+08	8.15664e+07	2.6372e+08	2.31132e+08	4.19615e+07	6.84575e+07	4.71167e+07	6.42347e+07	1.17449e+08	9.46279e+07
Com_13272_neg	2-(1-benzyl-1H-imidazol-5-yl)phenol	--	C16 H14 N2 O	250.11	6.665	295.109	--	--	--	--	--	--	--	--	--	--	Full match	No results	No results					4.05801	2.02077	0.00188595	0.944444	1.75207	up	4.04217e+06	3.76609e+06	2.77122e+06	850667	4.89228e+06	2.50582e+06	599662	530572	536812	539434	1.38885e+06	1.04444e+06
Com_5857_neg	(3R)-4,4-Dimethyl-2-oxotetrahydro-3-furanyl beta-D-glucopyranoside	--	C12 H20 O8	338.127	6.485	337.12	--	--	--	--	--	--	--	--	--	--	Invalid mass	No results	No results					0.133565	-2.90439	0.00188914	1	1.86268	down	870143	1.35511e+06	862045	836520	774242	778521	1.34107e+07	5.02665e+06	7.53594e+06	1.02869e+07	1.62644e+06	3.11659e+06
Com_5620_neg	Thymidine	Thymidine; Deoxythymidine	C10 H14 N2 O5	242.09	4.93	241.083	cpd:C00214	map00240 Pyrimidine metabolism;map01100 Metabolic pathways	HMDB0000273	--	Nucleosides, nucleotides, and analogues	Pyrimidine nucleosides	Pyrimidine 2'-deoxyribonucleosides	--	--	--	Full match	Full match	Full match	Nucleosides, nucleotides, and analogues	Pyrimidine nucleotides	Pyrimidine deoxyribonucleotides	Pyrimidine 2'-deoxyribonucleoside monophosphates	3.08974	1.62748	0.00189032	0.972222	1.7365	up	1.69352e+07	7.56769e+06	1.05385e+07	5.26764e+06	1.58064e+07	1.08878e+07	2.27776e+06	2.86243e+06	1.83355e+06	2.56795e+06	7.42138e+06	4.72262e+06
Com_1589_neg	Guanosine	Guanosine	C10 H13 N5 O5	283.091	4.644	282.084	cpd:C00387	map00230 Purine metabolism;map01100 Metabolic pathways	HMDB0000133	--	Nucleosides, nucleotides, and analogues	Purine nucleosides	-	--	--	--	Full match	Full match	Full match	Nucleosides, nucleotides, and analogues	Purine nucleosides	Not available	Purine nucleosides	2.92307	1.54749	0.00212333	1	1.71204	up	6.42534e+07	2.59999e+07	6.50932e+07	2.75191e+07	4.95176e+07	2.9067e+07	7.85629e+06	2.18455e+07	9.32273e+06	9.50104e+06	1.68349e+07	2.40832e+07
Com_2551_neg	H-Gly-Pro-OH	--	C7 H12 N2 O3	172.084	1.848	171.077	--	--	--	--	--	--	--	--	--	--	No results	No results	Full match	Organic acids and derivatives	Carboxylic acids and derivatives	Amino acids, peptides, and analogues	Dipeptides	2.99517	1.58264	0.00245032	1	1.80426	up	4.89932e+07	2.9697e+07	2.22142e+07	4.4623e+07	6.46565e+07	1.89194e+07	1.29744e+07	1.01187e+07	1.01613e+07	1.36565e+07	1.38183e+07	1.57617e+07
Com_3737_neg	2-Hydroxy-1-(4-methoxyphenyl)propyl hexopyranoside	--	C16 H24 O8	390.154	5.378	389.147	--	--	--	--	--	--	--	--	--	--	Invalid mass	No results	No results					2.05093	1.03628	0.00283658	0.944444	1.69548	up	2.33158e+07	1.62725e+07	2.22347e+07	1.18188e+07	2.34193e+07	1.39505e+07	6.60811e+06	7.2846e+06	5.63309e+06	8.96897e+06	1.21546e+07	1.3478e+07
Com_3147_neg	2-(2-oxo-2-{[2-(2-oxo-1-imidazolidinyl)ethyl]amino}ethoxy)acetic acid	--	C9 H15 N3 O5	245.101	1.819	244.093	--	--	--	--	--	--	--	--	--	--	Full match	No results	No results					3.45703	1.78953	0.00302834	0.972222	1.79036	up	3.6982e+07	2.00698e+07	2.73629e+07	2.33727e+07	3.70937e+07	2.33538e+07	3.49634e+06	5.34883e+06	5.08203e+06	3.26369e+06	2.19311e+07	9.54252e+06
Com_15760_neg	4-Hydroxy-L-Glutamic Acid	4-Hydroxy-L-glutamate; 4-Hydroxy-L-glutamic acid	C5 H9 N O5	163.049	2.657	162.041	cpd:C03079	--	HMDB0002273	--	Organic acids and derivatives	Carboxylic acids and derivatives	Amino acids, peptides, and analogues	--	--	--	No results	No results	Full match	Organic acids and derivatives	Carboxylic acids and derivatives	Amino acids, peptides, and analogues	Glutamic acid and derivatives	2.21521	1.14744	0.00310748	0.972222	1.67764	up	2.77819e+06	2.37651e+06	1.97998e+06	1.16819e+06	3.21014e+06	1.75552e+06	760959	704370	691375	1.10337e+06	1.74464e+06	985028
Com_313_neg	19(R)-hydroxy Prostaglandin E1	--	C20 H34 O6	370.235	5.803	369.228	--	--	--	--	--	--	--	--	--	--	Full match	No results	Full match	Lipids and lipid-like molecules	Fatty Acyls	Eicosanoids	Prostaglandins and related compounds	25.235	4.65735	0.00336792	0.944444	1.66057	up	1.29565e+08	1.08121e+07	5.80225e+07	1.03832e+07	1.23167e+08	4.45536e+08	4.22345e+06	7.08632e+06	599914	557731	1.2763e+06	1.70661e+07
Com_3755_neg	Deoxyguanosine	Deoxyguanosine; 2'-Deoxyguanosine	C10 H13 N5 O4	267.096	1.511	266.088	cpd:C00330	map00230 Purine metabolism;map01100 Metabolic pathways	HMDB0000085	--	Nucleosides, nucleotides, and analogues	Purine nucleosides	Purine 2'-deoxyribonucleosides	--	--	--	No results	No results	Full match	Nucleosides, nucleotides, and analogues	Purine nucleotides	Purine deoxyribonucleotides	Purine 2'-deoxyribonucleoside monophosphates	2.46426	1.30116	0.00339333	1	1.71599	up	2.87253e+07	1.76107e+07	1.68668e+07	3.196e+07	2.68123e+07	2.02697e+07	8.23034e+06	3.5537e+06	8.49675e+06	1.07282e+07	1.21607e+07	1.45533e+07
Com_7817_neg	17α-Hydroxypregnenolone	17alpha-Hydroxypregnenolone	C21 H32 O3	332.235	9.019	331.228	cpd:C05138	map01100 Metabolic pathways	--	--	--	--	--	--	--	--	Full match	No results	Full match	Lipids and lipid-like molecules	Steroids and steroid derivatives	Pregnane steroids	Gluco/mineralocorticoids, progestogins and derivatives	0.319556	-1.64586	0.00349245	0.944444	1.66407	down	2.08762e+06	4.06142e+06	1.0544e+06	1.1308e+06	973833	2.60433e+06	8.71646e+06	8.15687e+06	5.06725e+06	8.14155e+06	2.36779e+06	4.8281e+06
Com_513_neg	Asp-glu	--	C9 H14 N2 O7	262.08	1.488	261.073	--	--	HMDB0028752	--	Organic acids and derivatives	Carboxylic acids and derivatives	Amino acids, peptides, and analogues	--	--	--	No results	No results	Full match	Organic acids and derivatives	Carboxylic acids and derivatives	Amino acids, peptides, and analogues	Dipeptides	3.39889	1.76506	0.00370849	0.972222	1.7045	up	3.0719e+08	1.85501e+08	1.34205e+08	9.91592e+07	2.08917e+08	1.16656e+08	2.00651e+07	2.59702e+07	2.39605e+07	4.06045e+07	1.04717e+08	9.40865e+07
Com_12061_neg	3-(1-cyano-1,2-dihydroisoquinolin-2-yl)-3-oxopropyl propionate	--	C16 H16 N2 O3	284.111	2.751	283.103	--	--	--	--	--	--	--	--	--	--	Invalid mass	No results	No results					3.16778	1.66347	0.00372484	0.916667	1.69179	up	2.69021e+06	2.39229e+06	2.89243e+06	4.07369e+06	6.47196e+06	2.0208e+06	628068	566917	647570	485437	1.38793e+06	2.76854e+06
Com_8332_neg	Thymidine 3',5'-cyclic monophosphate	--	C10 H13 N2 O7 P	304.045	4.913	303.037	--	--	HMDB0001570	--	Organoheterocyclic compounds	Diazines	Pyrimidines and pyrimidine derivatives	--	--	--	Full match	No results	Full match	Organoheterocyclic compounds	Diazines	Pyrimidines and pyrimidine derivatives	Pyrimidones	0.107648	-3.21561	0.00407122	0.944444	1.6627	down	271096	384552	1.01376e+06	173991	247421	1.18357e+06	7.4271e+06	6.6676e+06	8.47043e+06	5.49556e+06	1.87738e+06	479463
Com_7208_neg	Guanethidine Monosulfate	--	C10 H24 N4 O4 S	296.153	6.173	295.145	--	--	HMDB0015301	--	Organic nitrogen compounds	Organonitrogen compounds	Guanidines	--	--	--	No results	No results	Full match	Organic acids and derivatives	Organic sulfuric acids and derivatives	Organic sulfuric acids	Organic sulfuric acids	0.375817	-1.4119	0.00453982	0.944444	1.65844	down	3.16285e+06	3.59261e+06	2.31089e+06	933773	4.23839e+06	2.57622e+06	9.35359e+06	6.6462e+06	7.21348e+06	9.21649e+06	3.24849e+06	9.06353e+06
Com_18799_neg	LPG 18:3	--	C24 H43 O9 P	506.264	8.429	505.257	--	--	--	LMGP04050032	--	--	--	Glycerophospholipids [GP]	Glycerophosphoglycerols [GP04]	Monoacylglycerophosphoglycerols [GP0405]	No results	Full match	No results	Lipids and lipid-like molecules	Glycerophospholipids	Glycerophosphoglycerols	Phosphatidylglycerols	2.62971	1.3949	0.0046504	0.916667	1.66039	up	1.72866e+06	1.98194e+06	1.22615e+06	724042	853495	582304	726486	339282	282397	611896	363442	375116
Com_172_neg	LPA 18:2	--	C21 H39 O7 P	434.243	9.402	433.236	--	--	--	LMGP10050044	--	--	--	Glycerophospholipids [GP]	Glycerophosphates [GP10]	Monoacylglycerophosphates [GP1005]	No results	Full match	No results	Lipids and lipid-like molecules	Glycerophospholipids	Glycerophosphates	1,2-diacylglycerol-3-phosphates	0.0194227	-5.68611	0.00524591	1	1.7516	down	4.71052e+06	1.23778e+07	5.13719e+06	7.59116e+06	2.64982e+06	5.04412e+06	2.05941e+07	2.69406e+07	2.19933e+08	3.48874e+08	1.27396e+09	4.09756e+07
Com_9540_neg	D-Gluconic acid	D-Gluconic acid; D-Gluconate; D-gluco-Hexonic acid	C6 H12 O7	196.059	4.789	195.052	cpd:C00257	map00030 Pentose phosphate pathway;map01100 Metabolic pathways;map01110 Biosynthesis of secondary metabolites;map01130 Biosynthesis of antibiotics;map01200 Carbon metabolism	HMDB0303730	--	Organic acids and derivatives	Hydroxy acids and derivatives	Medium-chain hydroxy acids and derivatives	--	--	--	No results	No results	Full match	Organic oxygen compounds	Organooxygen compounds	Carbohydrates and carbohydrate conjugates	Gluconolactones	1.51651	0.600755	0.00546485	0.916667	1.63023	up	5.04034e+06	4.32725e+06	5.70315e+06	6.99578e+06	4.93319e+06	5.61199e+06	2.87854e+06	3.25537e+06	3.71156e+06	2.71637e+06	3.65748e+06	5.28512e+06
Com_1468_neg	D-Alanyl-D-alanine	D-Alanyl-D-alanine; D-Ala-D-Ala	C6 H12 N2 O3	160.084	1.522	159.077	cpd:C00993	map01100 Metabolic pathways;map01502 Vancomycin resistance	HMDB0003459	--	Organic acids and derivatives	Carboxylic acids and derivatives	Amino acids, peptides, and analogues	--	--	--	Invalid mass	Invalid mass	No results	Organic acids and derivatives	Carboxylic acids and derivatives	Amino acids, peptides, and analogues	Dipeptides	2.27898	1.18839	0.00555649	0.944444	1.66803	up	8.97883e+07	4.61309e+07	7.11665e+07	4.72914e+07	8.44925e+07	7.02706e+07	1.60155e+07	2.1349e+07	1.73641e+07	2.56158e+07	3.53657e+07	6.38178e+07
Com_1411_neg	4-chloro-1H-indazol-3-amine	--	C7 H6 Cl N3	167.024	1.555	166.017	--	--	--	--	--	--	--	--	--	--	Full match	No results	No results					2.54449	1.34738	0.00556455	0.944444	1.6363	up	3.35312e+07	4.92863e+07	5.67869e+07	2.00709e+07	3.44363e+07	8.26627e+07	1.14931e+07	1.70269e+07	1.37397e+07	1.71648e+07	2.82576e+07	2.10917e+07
Com_723_neg	D-Glucose 6-phosphate	D-Glucose 6-phosphate; Glucose 6-phosphate; Robison ester	C6 H13 O9 P	214.024	1.424	259.022	cpd:C00092	map00500 Starch and sucrose metabolism;map00562 Inositol phosphate metabolism;map01100 Metabolic pathways;map01130 Biosynthesis of antibiotics	HMDB0001401	--	Organic oxygen compounds	Organooxygen compounds	Carbohydrates and carbohydrate conjugates	--	--	--	Invalid mass	Invalid mass	No match	Organic oxygen compounds	Organooxygen compounds	Carbohydrates and carbohydrate conjugates	Hexose phosphates	1.83417	0.875126	0.00582086	0.944444	1.60743	up	2.13177e+08	2.32305e+08	1.63127e+08	2.72207e+08	1.97293e+08	1.08821e+08	8.94235e+07	1.27249e+08	7.89143e+07	9.59465e+07	1.59924e+08	9.56635e+07
Com_540_neg	4-((5-(4-Nitrophenyl)oxazol-2-yl)amino)benzonitrile	--	C16 H10 N4 O3	306.071	1.435	305.064	--	--	--	--	--	--	--	--	--	--	Invalid mass	No results	No results	Organoheterocyclic compounds	Azoles	Oxazoles	Phenyl-1,3-oxazoles	2.2379	1.16214	0.00687461	0.916667	1.5847	up	2.91047e+08	1.69085e+08	1.74198e+08	3.61674e+08	2.87988e+08	1.28093e+08	6.07513e+07	7.37139e+07	7.68781e+07	8.72152e+07	1.60283e+08	1.72147e+08
Com_5790_neg	D-Ribulose 1,5-bisphosphate	D-Ribulose 1,5-bisphosphate	C5 H12 O11 P2	309.986	1.209	308.978	cpd:C01182	map00630 Glyoxylate and dicarboxylate metabolism;map01100 Metabolic pathways;map01110 Biosynthesis of secondary metabolites;map01130 Biosynthesis of antibiotics;map01200 Carbon metabolism	HMDB0244230	--	Organic oxygen compounds	Organooxygen compounds	Carbohydrates and carbohydrate conjugates	--	--	--	No results	Full match	Full match					0.178296	-2.48766	0.00770878	0.972222	1.70815	down	1.30836e+06	1.2852e+06	1.15627e+06	1.42802e+06	1.27501e+06	1.95099e+06	4.30385e+06	1.29517e+07	1.46356e+07	9.43005e+06	4.30782e+06	1.50524e+06
Com_2525_neg	2-Isopropylmalate	--	C7 H12 O5	176.068	5.337	157.05	--	--	HMDB0000402	--	Lipids and lipid-like molecules	Fatty Acyls	Fatty acids and conjugates	--	--	--	No results	No results	Full match	Lipids and lipid-like molecules	Fatty Acyls	Fatty acids and conjugates	Hydroxy fatty acids	0.141564	-2.82048	0.00796644	0.888889	1.70232	down	2.36506e+06	4.27299e+06	3.74971e+06	3.35244e+06	3.09138e+06	4.44307e+06	4.1583e+07	2.8146e+07	2.69099e+07	3.93175e+07	3.13143e+06	1.11952e+07
Com_2220_neg	2-[(1-benzhydrylazetan-3-yl)thio]-N'-(4-chlorobenzoyl)acetohydrazide	--	C25 H24 Cl N3 O2 S	465.133	6.92	464.126	--	--	--	--	--	--	--	--	--	--	Invalid mass	No results	No results					2.79616	1.48345	0.00889305	0.888889	1.57185	up	5.63364e+07	6.35661e+07	2.86855e+07	1.00586e+08	7.67848e+07	3.6461e+07	1.08735e+07	1.19585e+07	1.31658e+07	8.66516e+06	4.56517e+07	3.92987e+07
Com_8674_neg	Prostaglandin D1	Prostaglandin D1	C20 H34 O5	336.227	8.634	335.22	cpd:C06438	--	HMDB0005102	LMFA03010049	Lipids and lipid-like molecules	Fatty Acyls	Eicosanoids	Fatty Acyls [FA]	Eicosanoids [FA03]	Prostaglandins [FA0301]	Invalid mass	No results	No results	Lipids and lipid-like molecules	Fatty Acyls	Eicosanoids	Prostaglandins and related compounds	0.247083	-2.01693	0.00900166	0.888889	1.55216	down	561590	830768	456778	2.86603e+06	302882	1.51008e+06	2.31848e+06	6.0363e+06	7.34557e+06	6.86986e+06	2.78064e+06	1.06998e+06
Com_13970_neg	Prostaglandin F1β	--	C20 H36 O5	712.51	7.711	711.503	--	--	--	--	--	--	--	--	--	--	Invalid mass	No results	No results	Lipids and lipid-like molecules	Fatty Acyls	Eicosanoids	Prostaglandins and related compounds	4.0377	2.01353	0.00997943	0.916667	1.5838	up	1.93508e+06	2.10529e+06	2.79241e+06	700965	370099	2.52264e+06	314944	290183	322507	289453	994279	370914
Com_1809_neg	N-Carbamyl-L-glutamicacid	--	C6 H10 N2 O5	190.058	1.376	189.051	--	--	--	--	--	--	--	--	--	--	No results	No results	Full match	Benzenoids	Benzene and substituted derivatives	Diphenylmethanes	Diphenylmethanes	4.66104	2.22065	0.0102306	0.916667	1.65562	up	6.77118e+07	4.30358e+07	3.38609e+07	7.11939e+07	9.7839e+07	3.36287e+07	1.61967e+06	1.31894e+06	1.6754e+06	1.608e+06	2.42902e+07	4.39927e+07
Com_2073_neg	Chlorogenic Acid Methyl Ester	--	C17 H20 O9	368.111	5.377	403.081	--	--	--	--	--	--	--	--	--	--	No results	No results	Full match					0.192342	-2.37825	0.0107544	0.916667	1.53044	down	4.393e+06	3.1692e+06	1.57078e+07	3.71129e+06	2.61282e+06	1.25629e+07	4.92568e+07	4.1333e+07	5.6735e+07	4.75537e+07	2.01471e+07	4.15188e+06
Com_361_neg	Uric acid	Urate; Uric acid	C5 H4 N4 O3	168.028	1.911	167.02	cpd:C00366	map00230 Purine metabolism;map01100 Metabolic pathways	HMDB0000289	--	Organoheterocyclic compounds	Imidazopyrimidines	Purines and purine derivatives	--	--	--	Full match	Full match	Full match	Organoheterocyclic compounds	Imidazopyrimidines	Purines and purine derivatives	Xanthines	2.26048	1.17663	0.0108921	0.916667	1.52316	up	2.88221e+08	2.04201e+08	2.71518e+08	1.30714e+08	5.0515e+08	3.83212e+08	1.39496e+08	1.12105e+08	1.16529e+08	6.91878e+07	1.10226e+08	2.41235e+08
Com_2421_neg	N-acetyl-L-ornithine	--	C7 H14 N2 O3	174.1	1.899	173.092	--	--	HMDB0240589	--	Organic acids and derivatives	Carboxylic acids and derivatives	Amino acids, peptides, and analogues	--	--	--	No results	No results	Full match	Organic acids and derivatives	Carboxylic acids and derivatives	Amino acids, peptides, and analogues	N-acyl-L-alpha-amino acids	1.81628	0.860986	0.0117067	0.888889	1.53418	up	3.79536e+07	2.55317e+07	3.99941e+07	1.72025e+07	4.71461e+07	3.47471e+07	1.70166e+07	1.85237e+07	1.45824e+07	2.21661e+07	2.56355e+07	1.36087e+07
Com_6414_neg	LPA 16:0	--	C19 H39 O7 P	410.243	9.606	409.236	--	--	--	LMGP10050042	--	--	--	Glycerophospholipids [GP]	Glycerophosphates [GP10]	Monoacylglycerophosphates [GP1005]	No results	Full match	Full match	Lipids and lipid-like molecules	Glycerophospholipids	Glycerophosphates	1,2-diacylglycerol-3-phosphates	0.20301	-2.30038	0.0117936	0.972222	1.62944	down	825495	1.49381e+06	1.07709e+06	1.12823e+06	654870	1.27572e+06	1.41297e+06	2.33085e+06	3.84544e+06	4.34478e+06	1.69396e+07	2.92377e+06
Com_2759_neg	4-(4-cyclohexylphenyl)-4-oxobut-2-enoic acid	--	C16 H18 O3	258.121	2.51	257.114	--	--	--	--	--	--	--	--	--	--	Invalid mass	No results	No results					0.332717	-1.58763	0.0125101	0.944444	1.54741	down	6.2725e+06	5.26373e+06	9.69894e+06	3.61426e+06	7.64005e+06	1.08205e+07	1.68817e+07	1.76507e+07	1.66959e+07	1.47563e+07	7.91484e+06	5.6271e+07
Com_1029_neg	Biopterin	Biopterin; 2-Amino-6-(1,2-dihydroxypropyl)-4(1H)-pteridinone	C9 H11 N5 O3	191.079	1.466	236.077	cpd:C06313	--	HMDB0000468	--	Organoheterocyclic compounds	Pteridines and derivatives	Pterins and derivatives	--	--	--	Invalid mass	No results	No results	Organoheterocyclic compounds	Pteridines and derivatives	Pterins and derivatives	Biopterins and derivatives	2.22559	1.15419	0.0133069	0.916667	1.56893	up	1.25097e+08	5.65916e+07	1.02251e+08	1.04704e+08	1.16493e+08	1.20771e+08	2.05868e+07	3.06625e+07	2.16936e+07	3.69163e+07	6.81789e+07	1.03194e+08
Com_1568_neg	2-{2-oxo-2-[(2-oxo-3-azepanyl)amino]ethoxy}acetic acid	--	C10 H16 N2 O5	244.105	2.461	243.098	--	--	--	--	--	--	--	--	--	--	Full match	No results	No results					2.66911	1.41636	0.0134374	0.888889	1.50172	up	2.86186e+07	2.38723e+07	6.3493e+07	5.74776e+07	1.14294e+08	5.19022e+07	1.08732e+07	1.22991e+07	1.12803e+07	1.68626e+07	3.20611e+07	4.38788e+07
Com_8921_neg	Ouabain	Ouabain; G-Strophanthin	C29 H44 O12	630.286	4.948	629.278	cpd:C01443	--	HMDB0015224	LMST01120022	Benzenoids	Naphthalenes	-	Sterol Lipids [ST]	Sterols [ST01]	Cardanolides and derivatives [ST0112]	Invalid mass	No results	No results	Lipids and lipid-like molecules	Steroids and steroid derivatives	Steroid lactones	Cardenolide glycosides and derivatives	3.63653	1.86256	0.0136829	0.861111	1.50412	up	6.73732e+06	3.49749e+06	6.38773e+06	766951	2.9466e+06	4.86559e+06	797241	905410	882354	1.54761e+06	2.28975e+06	507776
Com_150_neg	N-Acetyl-L-glutamine	--	C7 H12 N2 O4	188.079	1.815	187.072	--	--	HMDB0006029	--	Organic acids and derivatives	Carboxylic acids and derivatives	Amino acids, peptides, and analogues	--	--	--	Full match	Full match	No results	Organic acids and derivatives	Carboxylic acids and derivatives	Amino acids, peptides, and analogues	Glutamine and derivatives	1.78396	0.835086	0.0140387	0.888889	1.50859	up	1.1498e+09	7.28053e+08	7.19027e+08	8.70235e+08	1.34577e+09	6.17637e+08	3.5293e+08	4.27873e+08	4.53545e+08	3.42365e+08	1.02757e+09	4.39797e+08
Com_1117_neg	D-Glucono-1,5-lactone	D-Glucono-1,5-lactone; Gluconic lactone; Gluconic acid lactone; 1,5-Gluconolactone; delta-Gluconolactone; D-Gluconolactone; Gluconolactone	C6 H10 O6	238.068	1.562	237.061	cpd:C00198	map00030 Pentose phosphate pathway;map01100 Metabolic pathways;map01110 Biosynthesis of secondary metabolites;map01130 Biosynthesis of antibiotics;map01200 Carbon metabolism	HMDB0000150	--	Organic oxygen compounds	Organooxygen compounds	Carbohydrates and carbohydrate conjugates	--	--	--	No results	Invalid mass	No results	Organic oxygen compounds	Organooxygen compounds	Carbohydrates and carbohydrate conjugates	Gluconolactones	0.490175	-1.02863	0.0144585	1	1.61768	down	3.87817e+07	3.94225e+07	3.57399e+07	3.30153e+07	3.38917e+07	4.01574e+07	8.83442e+07	8.36462e+07	1.14777e+08	8.26872e+07	4.0451e+07	4.09705e+07
Com_1968_neg	Gly-Tyr-Ala	--	C14 H19 N3 O5	309.132	2.409	308.125	--	--	--	--	--	--	--	--	--	--	No results	No results	Full match	Organic acids and derivatives	Carboxylic acids and derivatives	Amino acids, peptides, and analogues	Oligopeptides	4.11718	2.04166	0.0144898	0.944444	1.55622	up	2.43434e+07	8.60662e+06	1.39492e+07	5.88564e+06	2.45683e+07	5.7175e+07	4.42872e+06	4.57223e+06	3.62453e+06	5.60559e+06	4.95192e+06	9.49182e+06
Com_577_neg	N-Acetylornithine	N-Acetylornithine; N2-Acetyl-L-ornithine	C7 H14 N2 O3	174.1	3.432	173.092	cpd:C00437	map00220 Arginine biosynthesis;map01100 Metabolic pathways;map01110 Biosynthesis of secondary metabolites;map01130 Biosynthesis of antibiotics;map01210 2-Oxocarboxylic acid metabolism;map01230 Biosynthesis of amino acids	HMDB0240589	--	Organic acids and derivatives	Carboxylic acids and derivatives	Amino acids, peptides, and analogues	--	--	--	Full match	Full match	Full match	Organic acids and derivatives	Carboxylic acids and derivatives	Amino acids, peptides, and analogues	N-acyl-alpha amino acids	2.10111	1.07115	0.0153911	0.861111	1.52975	up	1.85855e+08	1.16612e+08	2.11894e+08	5.91725e+07	1.73447e+08	1.837e+08	6.83764e+07	7.09375e+07	5.42636e+07	1.03924e+08	6.57589e+07	7.96862e+07
Com_9294_neg	L-Cystathionine	L-Cystathionine	C7 H14 N2 O4 S	222.067	1.262	221.06	cpd:C02291	map00260 Glycine, serine and threonine metabolism;map00270 Cysteine and methionine metabolism;map01100 Metabolic pathways;map01110 Biosynthesis of secondary metabolites;map01130 Biosynthesis of antibiotics;map01230 Biosynthesis of amino acids	HMDB0000099	--	Organic acids and derivatives	Carboxylic acids and derivatives	Amino acids, peptides, and analogues	--	--	--	No results	No results	Full match	Organic acids and derivatives	Carboxylic acids and derivatives	Amino acids, peptides, and analogues	L-cysteine-S-conjugates	2.24552	1.16705	0.0159728	0.861111	1.48067	up	5.54422e+06	4.23613e+06	4.5297e+06	9.46905e+06	1.03053e+07	3.51047e+06	2.37688e+06	2.08006e+06	1.38602e+06	1.33531e+06	5.92127e+06	3.64263e+06
Com_13560_neg	LPA 15:0	--	C18 H37 O7 P	396.227	8.933	395.22	--	--	--	LMGP10050037	--	--	--	Glycerophospholipids [GP]	Glycerophosphates [GP10]	Monoacylglycerophosphates [GP1005]	No results	Full match	No results	Lipids and lipid-like molecules	Glycerophospholipids	Glycerophosphates	1,2-diacylglycerol-3-phosphates	0.366265	-1.44904	0.0162114	0.888889	1.47147	down	559354	645887	896393	762454	434459	1.62771e+06	2.19793e+06	3.3592e+06	1.84095e+06	2.2473e+06	3.24138e+06	563214
Com_1759_neg	Tryptophanol	--	C11 H14 N2 O	190.11	5.313	235.108	--	--	HMDB0244977	--	Organoheterocyclic compounds	Indoles and derivatives	Indoles	--	--	--	No results	No results	Full match	Organoheterocyclic compounds	Indoles and derivatives	Indoles	3-alkylindoles	1.67505	0.744202	0.016249	0.916667	1.47657	up	7.59424e+07	7.22249e+07	5.31915e+07	3.69574e+07	9.03856e+07	5.14605e+07	3.3019e+07	3.18185e+07	2.41187e+07	4.23156e+07	4.54114e+07	5.0273e+07
Com_5827_neg	7-Hydroxy-4-chromone	--	C9 H6 O3	162.031	5.59	207.029	--	--	--	--	--	--	--	--	--	--	No results	No results	Full match	Organoheterocyclic compounds	Benzopyrans	1-benzopyrans	Chromones	2.30068	1.20206	0.016434	0.888889	1.57681	up	1.38013e+07	7.61307e+06	1.23118e+07	9.92889e+06	1.46427e+07	9.70767e+06	4.78772e+06	3.3325e+06	1.28798e+07	2.34985e+06	1.44677e+06	4.76216e+06
Com_9365_neg	LPA 18:0	--	C21 H43 O7 P	438.274	11.207	437.267	--	--	--	LMGP10050043	--	--	--	Glycerophospholipids [GP]	Glycerophosphates [GP10]	Monoacylglycerophosphates [GP1005]	No results	Full match	Full match	Lipids and lipid-like molecules	Glycerophospholipids	Glycerophosphates	1,2-diacylglycerol-3-phosphates	0.294989	-1.76127	0.0165289	0.888889	1.45596	down	443081	3.60032e+06	307857	998058	663239	407176	3.39508e+06	1.35851e+06	4.22252e+06	2.19207e+06	9.2991e+06	1.29537e+06
Com_7877_neg	5-[(Benzoyloxy)methyl]-4,5,6-trihydroxy-2-cyclohexen-1-yl benzoate	--	C21 H20 O7	384.127	1.441	383.118	--	--	--	--	--	--	--	--	--	--	Invalid mass	No results	No results	Benzenoids	Benzene and substituted derivatives	Benzoic acids and derivatives	Benzoic acid esters	2.30741	1.20627	0.0167834	0.916667	1.49823	up	1.01883e+07	5.52379e+06	4.13978e+06	1.31161e+07	3.492e+06	4.45999e+06	2.11115e+06	2.22037e+06	2.50933e+06	5.22992e+06	3.13988e+06	2.52355e+06
Com_11403_neg	Pyrithioxin	--	C16 H20 N2 O4 S2	368.085	6.583	367.078	--	--	HMDB0256987	--	Organoheterocyclic compounds	Pyridines and derivatives	Methylpyridines	--	--	--	No results	No results	Full match	Organoheterocyclic compounds	Pyridines and derivatives	Methylpyridines	Methylpyridines	2.00068	1.00049	0.0169174	1	1.56703	up	1.63092e+06	1.68412e+06	4.17416e+06	1.30023e+06	1.75471e+06	1.30424e+06	980109	862546	920568	1.17447e+06	891794	1.09269e+06
Com_11838_neg	Kaempferol-3-Galactoside-6''-Rhamnoside-3'''-Rhamnoside	--	C33 H40 O19	740.211	2.71	739.203	--	--	--	--	--	--	--	--	--	--	Invalid mass	No results	No results					2.28845	1.19437	0.0176056	0.861111	1.51883	up	4.07893e+06	2.91041e+06	3.84297e+06	2.06643e+06	6.71405e+06	3.06954e+06	905290	751415	866093	703513	4.90106e+06	1.78428e+06
Com_2366_neg	Oleoyl-L-alpha-lysophosphatidic acid	--	C21 H40 Na O7 P	458.241	10.174	503.239	--	--	--	--	--	--	--	--	--	--	No results	No results	Full match	Lipids and lipid-like molecules	Glycerophospholipids	Glycerophosphates	1-acylglycerol-3-phosphates	0.044265	-4.49769	0.0187637	0.972222	1.55801	down	539178	1.27355e+06	380551	924092	544135	483624	1.63759e+06	2.10761e+06	1.16545e+07	1.20382e+07	6.5228e+07	977617
Com_3182_neg	Trehalose	alpha,alpha-Trehalose; alpha,alpha'-Trehalose; Trehalose	C12 H22 O11	342.116	6.756	341.108	cpd:C01083	map00500 Starch and sucrose metabolism;map01100 Metabolic pathways;map01110 Biosynthesis of secondary metabolites;map02010 ABC transporters	HMDB0000975	--	Organic oxygen compounds	Organooxygen compounds	Carbohydrates and carbohydrate conjugates	--	--	--	No results	No results	Full match	Organic oxygen compounds	Organooxygen compounds	Carbohydrates and carbohydrate conjugates	O-glycosyl compounds	0.332707	-1.58768	0.0192465	0.944444	1.5149	down	4.34579e+06	4.38911e+06	4.26559e+06	8.15864e+06	4.58735e+06	4.44124e+06	3.08418e+07	2.48529e+07	1.27657e+07	7.36868e+06	9.59785e+06	5.3067e+06
Com_8530_neg	(+/-)11(12)-EET	--	C20 H32 O3	320.235	7.83	319.228	--	--	--	--	--	--	--	--	--	--	Full match	No results	Full match	Lipids and lipid-like molecules	Fatty Acyls	Eicosanoids	Hepoxilins	0.420789	-1.24883	0.0196199	0.861111	1.45561	down	1.52815e+06	1.80016e+06	2.45281e+06	976479	1.44429e+06	2.51123e+06	5.35181e+06	4.1316e+06	5.08608e+06	7.07808e+06	2.23106e+06	1.58092e+06
Com_1207_neg	1-Methyluric acid	1-Methyluric acid	C6 H6 N4 O3	182.043	2.606	181.036	cpd:C16359	map00232 Caffeine metabolism	HMDB0003099	--	Organoheterocyclic compounds	Imidazopyrimidines	Purines and purine derivatives	--	--	--	No results	No results	Full match	Organoheterocyclic compounds	Imidazopyrimidines	Purines and purine derivatives	Xanthines	2.26052	1.17666	0.0200202	0.944444	1.50178	up	7.00054e+07	3.84124e+07	8.87071e+07	4.98416e+07	5.76646e+07	7.01411e+07	6.64383e+06	2.06645e+07	2.06693e+07	2.46548e+07	5.6551e+07	3.66068e+07
Com_2830_neg	N-Acetylneuraminic acid	N-Acetylneuraminate; N-Acetylneuraminic acid; 5-Acetamido-3,5-dideoxy-D-glycero-D-galacto-2-nonulosonic acid; Neu5Ac	C11 H19 N O9	309.106	1.424	308.098	cpd:C00270	map00520 Amino sugar and nucleotide sugar metabolism;map01100 Metabolic pathways	HMDB0000230	--	Organic oxygen compounds	Organooxygen compounds	Carbohydrates and carbohydrate conjugates	--	--	--	Full match	No results	Full match	Organic oxygen compounds	Organooxygen compounds	Carbohydrates and carbohydrate conjugates	N-acylneuraminic acids	3.75054	1.9071	0.020517	0.861111	1.49193	up	4.16712e+07	3.59692e+07	1.23752e+07	1.34454e+07	5.70285e+07	2.01371e+07	1.97133e+06	3.14941e+06	644561	6.15165e+06	2.13574e+07	1.48858e+07
Com_5677_neg	LPI 15:0	--	C24 H47 O12 P	558.28	9.047	557.273	--	--	--	LMGP06050030	--	--	--	Glycerophospholipids [GP]	Glycerophosphoinositols [GP06]	Monoacylglycerophosphoinositols [GP0605]	No results	Full match	No results	Lipids and lipid-like molecules	Glycerophospholipids	Glycerophosphoinositols	Phosphatidylinositols	0.395405	-1.3386	0.0211816	1	1.50176	down	3.29538e+06	6.46939e+06	3.22464e+06	4.11423e+06	704170	7.04447e+06	7.09043e+06	1.45201e+07	9.14861e+06	1.20259e+07	1.29268e+07	7.14081e+06
Com_2285_neg	PE 16:1_18:2	--	C39 H72 N O8 P	713.5	10.283	712.492	--	--	--	LMGP02011219	--	--	--	Glycerophospholipids [GP]	Glycerophosphoethanolamines [GP02]	Diacylglycerophosphoethanolamines [GP0201]	No results	Full match	No results					5.22047	2.38418	0.0219758	0.916667	1.47417	up	1.22115e+07	1.32655e+07	4.28579e+07	7.25461e+07	5.97768e+06	1.5338e+07	2.95168e+06	9.21806e+06	1.01543e+07	427158	7.48958e+06	828569
Com_533_neg	Cinnamoylglycine	--	C11 H11 N O3	205.073	5.53	204.066	--	--	HMDB0011621	--	Organic acids and derivatives	Carboxylic acids and derivatives	Amino acids, peptides, and analogues	--	--	--	Full match	No results	Full match	Organic acids and derivatives	Carboxylic acids and derivatives	Amino acids, peptides, and analogues	N-acyl-alpha amino acids	0.166953	-2.58248	0.0220566	0.861111	1.47035	down	2.12109e+07	4.06784e+07	3.31648e+07	9.62758e+06	1.77709e+07	3.36532e+07	2.36874e+08	1.7091e+08	2.14122e+08	2.33474e+08	6.73692e+07	1.22783e+07
Com_14380_neg	5-(3-chloro-4-methylanilino)-1-methyl-1H-pyrazol-3-ol	--	C11 H12 Cl N3 O	237.067	4.681	236.06	--	--	--	--	--	--	--	--	--	--	Full match	No results	No results					2.83964	1.50571	0.022114	0.805556	1.42412	up	3.39752e+06	2.47206e+06	2.28151e+06	464545	3.43416e+06	2.71079e+06	499841	501029	526352	551001	2.4011e+06	718730
Com_1922_neg	N-α-Acetyl-L-asparagine	--	C6 H10 N2 O4	174.063	1.564	173.056	--	--	--	--	--	--	--	--	--	--	Full match	No results	No results	Organic acids and derivatives	Carboxylic acids and derivatives	Amino acids, peptides, and analogues	Asparagine and derivatives	1.76494	0.819623	0.0221382	0.888889	1.42744	up	6.82683e+07	5.03321e+07	3.70145e+07	6.71394e+07	7.89367e+07	3.40778e+07	2.24177e+07	2.36147e+07	2.51769e+07	2.08331e+07	6.12108e+07	3.69901e+07
Com_10313_neg	6-Methoxy-2-naphthoic acid	--	C12 H10 O3	202.062	5.828	201.055	--	--	--	--	--	--	--	--	--	--	No results	No results	Full match	Benzenoids	Naphthalenes	Naphthalenecarboxylic acids and derivatives	Naphthalenecarboxylic acids	1.99429	0.995873	0.0230565	0.944444	1.4748	up	4.78017e+06	7.09926e+06	5.03096e+06	2.42934e+06	5.96311e+06	5.01106e+06	4.60325e+06	2.32091e+06	2.33067e+06	3.6333e+06	1.28492e+06	1.02733e+06
Com_4401_neg	D-Glucosamine 6-phosphate	D-Glucosamine 6-phosphate; D-Glucosamine phosphate	C6 H14 N O8 P	259.046	1.246	258.039	cpd:C00352	map00250 Alanine, aspartate and glutamate metabolism;map00520 Amino sugar and nucleotide sugar metabolism;map01100 Metabolic pathways;map01130 Biosynthesis of antibiotics	HMDB0001254	--	Organic oxygen compounds	Organooxygen compounds	Carbohydrates and carbohydrate conjugates	--	--	--	No results	No results	Full match	Organic oxygen compounds	Organooxygen compounds	Carbohydrates and carbohydrate conjugates	Hexose phosphates	0.533417	-0.906665	0.023342	0.888889	1.49708	down	7.57464e+06	4.75019e+06	8.27742e+06	3.21243e+06	6.28621e+06	1.74757e+07	9.15349e+06	1.34248e+07	1.29131e+07	1.83917e+07	1.83234e+07	1.69856e+07
Com_10731_neg	20-Carboxy-Leukotriene B4	20-COOH-Leukotriene B4; 20-COOH-LTB4; 20-Carboxy-leukotriene B4; 5,12-Dihydroxy-Delta5,8,11,14-eicosapolyendioic acid	C20 H30 O6	366.204	5.766	365.197	cpd:C05950	map00590 Arachidonic acid metabolism	HMDB0006059	LMFA03020016	Lipids and lipid-like molecules	Fatty Acyls	Fatty acids and conjugates	Fatty Acyls [FA]	Eicosanoids [FA03]	Leukotrienes [FA0302]	No results	No results	Full match					5.62435	2.49169	0.0240874	0.916667	1.46287	up	3.7794e+06	377965	865012	558020	1.35141e+06	5.22242e+06	433659	372966	439873	377774	390457	146273
Com_17293_neg	LPE O-18:1	--	C23 H48 N O6 P	465.322	10.573	464.314	--	--	--	--	--	--	--	--	--	--	No results	Full match	No results					2.77728	1.47367	0.0250846	0.916667	1.43163	up	669118	309331	417278	623599	334296	1.8926e+06	192261	201883	227592	177516	297936	431725
Com_4347_neg	LPS 15:0	--	C21 H42 N O9 P	483.259	8.925	482.252	--	--	--	LMGP03050031	--	--	--	Glycerophospholipids [GP]	Glycerophosphoserines [GP03]	Monoacylglycerophosphoserines [GP0305]	No results	Full match	No results	Lipids and lipid-like molecules	Glycerophospholipids	Glycerophosphoserines	Phosphatidylserines	0.404236	-1.30673	0.0261592	0.861111	1.38239	down	4.62592e+06	6.0554e+06	6.11441e+06	4.80321e+06	1.43233e+06	1.13327e+07	1.38e+07	2.05942e+07	1.18425e+07	1.36488e+07	2.08349e+07	4.28907e+06
Com_2081_neg	Lactitol	--	C12 H24 O11	344.131	1.438	343.124	--	--	HMDB0040937	--	Lipids and lipid-like molecules	Fatty Acyls	Fatty acyl glycosides	--	--	--	No results	No results	Full match	Lipids and lipid-like molecules	Fatty Acyls	Fatty acyl glycosides	Fatty acyl glycosides of mono- and disaccharides	1.61738	0.693659	0.0265005	0.833333	1.41198	up	3.16196e+07	2.75812e+07	4.79615e+07	4.99207e+07	4.16675e+07	4.56875e+07	1.71845e+07	1.88393e+07	1.71331e+07	1.84075e+07	3.35508e+07	4.60168e+07
Com_6030_neg	5'-Adenylic acid	AMP; Adenosine 5'-monophosphate; Adenylic acid; Adenylate; 5'-AMP; 5'-Adenylic acid; 5'-Adenosine monophosphate; Adenosine 5'-phosphate	C10 H14 N5 O7 P	347.063	4.629	346.056	cpd:C00020	map00230 Purine metabolism;map01100 Metabolic pathways;map01110 Biosynthesis of secondary metabolites;map01130 Biosynthesis of antibiotics	HMDB0011617	--	Organic oxygen compounds	Organooxygen compounds	Carbohydrates and carbohydrate conjugates	--	--	--	No results	No results	Full match	Nucleosides, nucleotides, and analogues	Purine nucleotides	Purine ribonucleotides	Purine ribonucleoside monophosphates	0.53221	-0.909932	0.0267173	0.888889	1.45258	down	3.06583e+06	1.27708e+07	5.55802e+06	1.01307e+07	4.52991e+06	2.82214e+06	1.1768e+07	1.32348e+07	1.35277e+07	1.06079e+07	1.56637e+07	8.24683e+06
Com_13700_neg	15(R)-Lipoxin A4	--	C20 H32 O5	352.222	7.521	351.215	--	--	--	--	--	--	--	--	--	--	Invalid mass	No results	No results	Lipids and lipid-like molecules	Fatty Acyls	Eicosanoids	Lipoxins	0.342389	-1.54629	0.0267655	0.833333	1.38716	down	171872	232922	294902	1.50406e+06	210946	891097	1.13558e+06	1.48592e+06	3.42157e+06	2.33833e+06	822498	451189
Com_12312_neg	LPE O-16:1	--	C21 H44 N O6 P	437.29	9.745	436.283	--	--	--	--	--	--	--	--	--	--	No results	Full match	No results					5.79704	2.53532	0.0276546	0.972222	1.49361	up	1.79937e+06	293704	1.29394e+06	519505	307838	4.02638e+06	228380	219301	216737	185249	294070	277807
Com_4470_neg	Dehydroepiandrosterone	Dehydroepiandrosterone; 3beta-Hydroxyandrost-5-en-17-one; Dehydroisoandrosterone; DHA; DHEA	C19 H28 O2	288.209	5.786	287.202	cpd:C01227	map01100 Metabolic pathways	HMDB0000077	LMST02020021	Lipids and lipid-like molecules	Steroids and steroid derivatives	Androstane steroids	Sterol Lipids [ST]	Steroids [ST02]	C19 steroids (androgens) and derivatives [ST0202]	No results	No results	Full match	Lipids and lipid-like molecules	Steroids and steroid derivatives	Androstane steroids	Androgens and derivatives	11.6426	3.54134	0.0289299	0.944444	1.48722	up	4.97426e+06	467179	2.04115e+06	689733	5.13662e+06	1.96137e+07	536019	442816	543699	466943	388598	449706
Com_554_neg	L-Aspartic acid	L-Aspartate; L-Aspartic acid; 2-Aminosuccinic acid; L-Asp	C4 H7 N O4	133.037	1.364	132.029	cpd:C00049	map00220 Arginine biosynthesis;map00250 Alanine, aspartate and glutamate metabolism;map00260 Glycine, serine and threonine metabolism;map00261 Monobactam biosynthesis;map00270 Cysteine and methionine metabolism;map00300 Lysine biosynthesis;map00340 Histidine metabolism;map00410 beta-Alanine metabolism;map00460 Cyanoamino acid metabolism;map00760 Nicotinate and nicotinamide metabolism;map00770 Pan…	HMDB0000191	--	Organic acids and derivatives	Carboxylic acids and derivatives	Amino acids, peptides, and analogues	--	--	--	Invalid mass	Invalid mass	No results	Organic acids and derivatives	Carboxylic acids and derivatives	Amino acids, peptides, and analogues	Aspartic acid and derivatives	2.41301	1.27083	0.0295497	0.861111	1.35629	up	2.10855e+08	2.19062e+08	1.22635e+08	6.62378e+08	3.35632e+08	2.46046e+08	1.12893e+08	7.06499e+07	7.96058e+07	3.54989e+07	1.48979e+08	2.96925e+08
Com_2460_neg	Prostaglandin A1	(13E)-(15S)-15-Hydroxy-9-oxoprosta-10,13-dienoate; Prostaglandin A1; PGA1	C20 H32 O4	318.219	6.477	317.212	cpd:C04685	--	HMDB0002656	LMFA03010005	Lipids and lipid-like molecules	Fatty Acyls	Eicosanoids	Fatty Acyls [FA]	Eicosanoids [FA03]	Prostaglandins [FA0301]	Invalid mass	No results	No results	Lipids and lipid-like molecules	Fatty Acyls	Eicosanoids	Prostaglandins and related compounds	13.83	3.78973	0.0313145	0.944444	1.47315	up	1.08642e+07	970683	5.97818e+06	943497	1.17199e+07	4.40487e+07	921915	897340	808711	859278	839644	1.06178e+06
Com_11501_neg	Verbascose	Verbascose; beta-D-Fructofuranosyl O-alpha-D-galactopyranosyl-(1-6)-O-alpha-D-galactopyranosyl-(1-6)-O-alpha-D-galactopyranosyl-(1-6)-alpha-D-glucopyranoside	C30 H52 O26	828.275	1.558	827.267	cpd:C08252	--	HMDB0259784	--	Organic oxygen compounds	Organooxygen compounds	Carbohydrates and carbohydrate conjugates	--	--	--	No results	Full match	No results	Organic oxygen compounds	Organooxygen compounds	Carbohydrates and carbohydrate conjugates	Oligosaccharides	2.10089	1.071	0.0316259	0.916667	1.34787	up	5.33993e+06	4.86059e+06	2.16089e+06	7.5699e+06	2.85969e+06	3.10495e+06	643623	1.68652e+06	1.33709e+06	1.98146e+06	2.15107e+06	4.52644e+06
Com_1782_neg	Indole-3-acetic acid	Indole-3-acetate; Indole-3-acetic acid; (Indol-3-yl)acetate; Indoleacetate; Indoleacetic acid; IAA	C10 H9 N O2	175.063	5.556	174.055	cpd:C00954	map00380 Tryptophan metabolism;map01100 Metabolic pathways	HMDB0302181	--	Organoheterocyclic compounds	Indoles and derivatives	Indolyl carboxylic acids and derivatives	--	--	--	Full match	No results	Full match	Organoheterocyclic compounds	Indoles and derivatives	Indolyl carboxylic acids and derivatives	Indole-3-acetic acid derivatives	0.143231	-2.80359	0.0328827	0.805556	1.41439	down	1.59466e+06	5.35209e+06	4.68632e+06	2.3497e+06	3.97131e+06	5.59346e+06	2.60622e+07	2.48935e+07	4.68338e+07	5.9295e+07	5.01683e+06	2.30141e+06
Com_1025_neg	Prostaglandin E3	Prostaglandin E3	C20 H30 O5	350.209	5.931	349.202	cpd:C06439	--	HMDB0002664	LMFA03010135	Lipids and lipid-like molecules	Fatty Acyls	Eicosanoids	Fatty Acyls [FA]	Eicosanoids [FA03]	Prostaglandins [FA0301]	Full match	Full match	No results	Lipids and lipid-like molecules	Fatty Acyls	Eicosanoids	Prostaglandins and related compounds	4.34478	2.11928	0.033798	0.888889	1.38002	up	3.86819e+07	7.95821e+06	2.40152e+07	1.09765e+07	3.44526e+07	1.21141e+08	1.22445e+07	7.04441e+06	6.32677e+06	7.44053e+06	1.65195e+07	5.02444e+06
Com_10878_neg	LPI 17:0	--	C26 H51 O12 P	586.312	10.398	585.305	--	--	--	LMGP06050029	--	--	--	Glycerophospholipids [GP]	Glycerophosphoinositols [GP06]	Monoacylglycerophosphoinositols [GP0605]	No results	Full match	No results	Lipids and lipid-like molecules	Glycerophospholipids	Glycerophosphoinositols	Phosphatidylinositols	0.492563	-1.02162	0.0370953	0.861111	1.32996	down	1.65682e+06	3.11837e+06	1.11689e+06	1.13313e+06	622371	3.77754e+06	4.28841e+06	5.17527e+06	3.88343e+06	2.73094e+06	5.46482e+06	1.65238e+06
Com_9229_neg	cholesteryl sulfate	--	C27 H46 O4 S	466.314	9.459	465.306	--	--	HMDB0000653	LMST05020016	Lipids and lipid-like molecules	Steroids and steroid derivatives	Cholestane steroids	Sterol Lipids [ST]	Steroid conjugates [ST05]	Sulfates [ST0502]	No results	No results	Full match	Lipids and lipid-like molecules	Steroids and steroid derivatives	Cholestane steroids	Cholesterols and derivatives	0.288677	-1.79247	0.0371802	0.888889	1.44159	down	1.38177e+06	940819	1.14985e+06	543825	726384	906477	2.25073e+06	1.68048e+06	1.81527e+06	800834	3.06217e+06	9.95955e+06
Com_325_neg	2,3-Dinor-8-epi-prostaglandin F2α	--	C18 H30 O5	326.209	6.084	325.202	--	--	--	--	--	--	--	--	--	--	Full match	No results	No results	Lipids and lipid-like molecules	Fatty Acyls	Eicosanoids	Prostaglandins and related compounds	1.72763	0.788793	0.0372978	0.861111	1.33675	up	2.28324e+08	1.46127e+08	3.74942e+08	2.28871e+08	2.08099e+08	3.25866e+08	2.64978e+08	7.0414e+07	1.03147e+08	2.05237e+08	9.13292e+07	1.40216e+08
Com_494_neg	Sucrose	Sucrose; Cane sugar; Saccharose; 1-alpha-D-Glucopyranosyl-2-beta-D-fructofuranoside	C12 H22 O11	342.116	1.865	341.109	cpd:C00089	map00052 Galactose metabolism;map00500 Starch and sucrose metabolism;map01100 Metabolic pathways;map02010 ABC transporters	HMDB0000258	--	Organic oxygen compounds	Organooxygen compounds	Carbohydrates and carbohydrate conjugates	--	--	--	Full match	Full match	Full match	Organic oxygen compounds	Organooxygen compounds	Carbohydrates and carbohydrate conjugates	O-glycosyl compounds	0.572773	-0.803965	0.0380104	0.833333	1.34089	down	1.01375e+08	1.06647e+08	9.69412e+07	1.50953e+08	1.51818e+08	9.00063e+07	2.63949e+08	2.34812e+08	2.87988e+08	1.66301e+08	1.78791e+08	8.63407e+07
Com_6397_neg	Sedoheptulose 1,7-bisphosphate	Sedoheptulose 1,7-bisphosphate; D-Sedoheptulose 1,7-bisphosphate; D-altro-Heptulose 1,7-biphosphate	C7 H16 O13 P2	370.007	1.204	368.999	cpd:C00447	map01100 Metabolic pathways;map01200 Carbon metabolism	HMDB0060274	--	Organic oxygen compounds	Organooxygen compounds	Carbohydrates and carbohydrate conjugates	--	--	--	No results	No results	Full match					0.635957	-0.652999	0.0390763	0.833333	1.31583	down	4.90615e+06	4.67894e+06	4.72854e+06	7.17964e+06	7.9411e+06	5.11361e+06	6.96376e+06	1.08599e+07	1.2657e+07	1.07961e+07	8.27841e+06	4.76928e+06
Com_5444_neg	PA 18:1_18:1	--	C39 H73 O8 P	700.504	11.669	699.497	--	--	--	LMGP10010962	--	--	--	Glycerophospholipids [GP]	Glycerophosphates [GP10]	Diacylglycerophosphates [GP1001]	No results	Full match	No results					0.2251	-2.15136	0.0396019	0.861111	1.34253	down	767451	985961	564919	2.81568e+06	2.00509e+06	651782	1.48919e+07	2.9592e+06	669239	7.21968e+06	6.63372e+06	2.23708e+06
Com_4827_neg	dUMP	dUMP; Deoxyuridylic acid; Deoxyuridine monophosphate; Deoxyuridine 5'-phosphate; 2'-Deoxyuridine 5'-phosphate	C9 H13 N2 O8 P	308.041	1.564	307.033	cpd:C00365	map00240 Pyrimidine metabolism;map01100 Metabolic pathways	HMDB0001409	--	Nucleosides, nucleotides, and analogues	Pyrimidine nucleotides	Pyrimidine deoxyribonucleotides	--	--	--	No results	No results	Full match	Nucleosides, nucleotides, and analogues	Pyrimidine nucleotides	Pyrimidine deoxyribonucleotides	Pyrimidine 2'-deoxyribonucleoside monophosphates	1.84005	0.879749	0.0397989	0.833333	1.3567	up	2.06175e+07	1.15051e+07	1.38248e+07	1.07606e+07	8.63104e+06	1.23284e+07	3.76608e+06	7.45514e+06	3.96602e+06	1.47721e+07	9.75464e+06	2.49539e+06
Com_553_neg	Guanosine monophosphate (GMP)	--	C10 H14 N5 O8 P	363.058	1.682	362.05	--	--	--	--	--	--	--	--	--	--	Full match	Full match	Full match	Nucleosides, nucleotides, and analogues	Purine nucleotides	Purine ribonucleotides	Purine ribonucleoside monophosphates	0.375422	-1.41342	0.0398866	0.833333	1.41532	down	4.77503e+06	3.45111e+08	7.5065e+07	9.40498e+07	5.11272e+06	1.80978e+06	2.364e+08	2.01886e+08	2.41891e+08	1.7655e+08	3.18432e+08	2.25729e+08
Com_2217_neg	DL-Arginine	--	C6 H14 N4 O2	174.111	1.322	173.104	--	--	HMDB0251511	--	Organic acids and derivatives	Carboxylic acids and derivatives	Amino acids, peptides, and analogues	--	--	--	Full match	Full match	Full match	Organic acids and derivatives	Carboxylic acids and derivatives	Amino acids, peptides, and analogues	Arginine and derivatives	2.39346	1.2591	0.0408631	0.833333	1.31367	up	5.79022e+07	3.34228e+07	1.82099e+07	7.24298e+07	6.32735e+07	1.60389e+07	6.41773e+06	1.00598e+07	8.81631e+06	9.62256e+06	3.94481e+07	3.47985e+07
Com_691_neg	13(S)-HOTrE	13(S)-HOT; (9Z,11E,15Z)-(13S)-Hydroxyoctadeca-9,11,15-trienoate; (9Z,11E,15Z)-(13S)-13-Hydroxyoctadeca-9,11,15-trienoic acid; (9Z,11E,13S,15Z)-13-Hydroxyoctadeca-9,11,15-trienoic acid; 13(S)-HOTrE	C18 H30 O3	294.219	7.835	293.212	cpd:C16316	map00592 alpha-Linolenic acid metabolism	--	--	--	--	--	--	--	--	Full match	No results	Full match	Lipids and lipid-like molecules	Fatty Acyls	Lineolic acids and derivatives	Lineolic acids and derivatives	0.652493	-0.615965	0.0409526	0.805556	1.29078	down	7.11358e+07	1.25896e+08	1.07199e+08	1.55274e+08	6.45034e+07	1.10995e+08	1.0525e+08	1.70778e+08	1.53602e+08	1.77557e+08	1.20032e+08	2.45974e+08
Com_1929_neg	Oxaceprol	--	C7 H11 N O4	173.068	1.744	172.061	--	--	HMDB0000725	--	Organic acids and derivatives	Carboxylic acids and derivatives	Amino acids, peptides, and analogues	--	--	--	No results	No results	Full match	Organic acids and derivatives	Carboxylic acids and derivatives	Amino acids, peptides, and analogues	Proline and derivatives	0.230264	-2.11864	0.0415511	0.805556	1.37768	down	6.45753e+06	4.75273e+06	1.02575e+07	5.15231e+06	6.66615e+06	9.69141e+06	5.74176e+07	3.35627e+07	5.30045e+07	3.0719e+07	6.82955e+06	5.11157e+06
Com_444_neg	Adenosine 5'-monophosphate	AMP; Adenosine 5'-monophosphate; Adenylic acid; Adenylate; 5'-AMP; 5'-Adenylic acid; 5'-Adenosine monophosphate; Adenosine 5'-phosphate	C10 H14 N5 O7 P	347.063	1.84	346.055	cpd:C00020	map00230 Purine metabolism;map01100 Metabolic pathways;map01110 Biosynthesis of secondary metabolites;map01130 Biosynthesis of antibiotics	HMDB0000045	--	Nucleosides, nucleotides, and analogues	Purine nucleotides	Purine ribonucleotides	--	--	--	Full match	Full match	Full match	Nucleosides, nucleotides, and analogues	Purine nucleotides	Purine ribonucleotides	Purine ribonucleoside monophosphates	0.342833	-1.54442	0.0423039	0.916667	1.36396	down	1.83224e+07	2.15991e+08	8.59503e+07	7.19923e+07	3.80413e+07	2.89152e+06	3.00324e+08	2.26447e+08	3.17168e+08	1.17045e+08	1.13955e+08	1.88616e+08
Com_1108_neg	Asparagine	Asparagine	C4 H8 N2 O3	132.053	1.311	131.045	cpd:C16438	--	HMDB0251512	--	Organic acids and derivatives	Carboxylic acids and derivatives	Amino acids, peptides, and analogues	--	--	--	Invalid mass	Invalid mass	No results	Organic acids and derivatives	Carboxylic acids and derivatives	Amino acids, peptides, and analogues	Asparagine and derivatives	2.2829	1.19087	0.0423268	0.805556	1.32272	up	9.73871e+07	6.76517e+07	5.19844e+07	1.97048e+08	1.70469e+08	5.05867e+07	1.85123e+07	1.87945e+07	1.74564e+07	2.21438e+07	1.04252e+08	9.7051e+07
Com_2357_neg	N1-(3-amino-4-chlorophenyl)-2-[2,4-di(tert-pentyl)phenoxy]acetamide	--	C24 H33 Cl N2 O2	416.227	5.443	415.22	--	--	--	--	--	--	--	--	--	--	Invalid mass	No results	No results					2.48668	1.31422	0.0435137	0.833333	1.34857	up	4.26407e+07	3.64809e+07	3.88458e+07	7.43892e+06	4.9763e+07	4.6357e+07	1.32894e+07	1.37252e+07	9.76556e+06	2.03661e+07	1.43779e+07	1.7561e+07
Com_209_neg	Ribulose-5-phosphate	--	C5 H11 O8 P	230.019	2.03	211.001	--	--	--	--	--	--	--	--	--	--	No results	No results	Full match	Organic oxygen compounds	Organooxygen compounds	Carbohydrates and carbohydrate conjugates	Pentose phosphates	0.414632	-1.2701	0.0444668	0.861111	1.31165	down	3.65401e+07	5.34455e+08	1.48171e+08	1.64677e+08	3.67064e+07	2.19737e+07	1.48472e+08	2.54058e+08	4.37938e+08	6.63685e+08	5.77705e+08	1.913e+08
Com_832_neg	PE 18:2_18:2	--	C41 H74 N O8 P	739.515	11.068	738.508	--	--	--	LMGP02010112	--	--	--	Glycerophospholipids [GP]	Glycerophosphoethanolamines [GP02]	Diacylglycerophosphoethanolamines [GP0201]	No results	Full match	No results					3.21698	1.68571	0.045298	0.916667	1.38529	up	5.36351e+07	6.94147e+07	1.38397e+08	1.35797e+08	2.30048e+07	6.02157e+07	1.90519e+07	4.34779e+07	4.72068e+07	3.13806e+06	3.48917e+07	1.58626e+06
Com_2896_neg	LPE 18:0	--	C23 H48 N O7 P	481.316	10.213	480.309	--	--	--	LMGP02050038	--	--	--	Glycerophospholipids [GP]	Glycerophosphoethanolamines [GP02]	Monoacylglycerophosphoethanolamines [GP0205]	No results	Full match	Full match	Lipids and lipid-like molecules	Glycerophospholipids	Glycerophosphoethanolamines	1-acyl-sn-glycero-3-phosphoethanolamines	1.73934	0.798537	0.04576	0.833333	1.29288	up	4.17809e+07	4.59818e+07	2.26164e+07	3.1708e+07	2.07252e+07	2.67878e+07	2.2367e+07	1.10098e+07	1.30716e+07	6.84991e+06	3.41934e+07	2.15155e+07
Com_5068_neg	Hydroquinone	Hydroquinone; p-Benzenediol; 1,4-Benzenediol; 1,4-Dihydroxybenzene; Benzene-1,4-diol; Quinol; 4-Hydroxyphenol	C6 H6 O2	110.036	5.374	265.071	cpd:C00530	map00350 Tyrosine metabolism;map01100 Metabolic pathways	HMDB0002434	--	Benzenoids	Phenols	Benzenediols	--	--	--	No results	No results	Full match	Benzenoids	Phenols	Benzenediols	Hydroquinones	0.551558	-0.858416	0.0467965	0.833333	1.27708	down	7.06654e+06	3.5924e+06	1.35268e+07	6.72173e+06	3.5663e+06	1.4527e+07	1.48466e+07	1.44196e+07	1.4392e+07	1.3332e+07	7.30667e+06	2.45438e+07
Com_285_neg	D-(-)-Fructose	--	C6 H12 O6	180.063	1.416	179.055	--	--	HMDB0000660	--	Organic oxygen compounds	Organooxygen compounds	Carbohydrates and carbohydrate conjugates	--	--	--	Full match	Full match	Full match	Organic oxygen compounds	Organooxygen compounds	Carbohydrates and carbohydrate conjugates	C-glycosyl compounds	1.74776	0.80551	0.0497577	0.833333	1.25024	up	2.76081e+08	2.92585e+08	3.87557e+08	1.49275e+08	2.48076e+08	4.96599e+08	1.41819e+08	1.32862e+08	7.72967e+07	1.93259e+08	1.24033e+08	3.89327e+08
